# Supplementary material for: Relevance and Rigor in Premedical Education
Source: Atypon-hosted journal article supplement (doi:10.1056/nejmp0803098), 2008-07-16
Supplement: nejm_dienstag_221sa1.pdf [file nejm_dienstag_221sa1.pdf]

## Supplementary Appendix

This appendix has been provided by the author to give readers additional information about his work.

Supplement to: Dienstag JL. Relevance and rigor in premedical education. *N Engl J Med* 2008;359:221-4.

**Report of the Working Group on Admission Requirements**

**Harvard Medical School**

**August 9, 2004**

## Executive Summary

The HMS Working Group on Admission Requirements identified the following **guiding principles** for premedical science education:

1. Develop a seamless continuum from the premedical to the medical curriculum.
2. Acknowledge the permeation of biochemistry, cell biology, genetics in most areas of medicine.
3. Integrate human biology into undergraduate science education – make premedical sciences more relevant.
4. Foster scholastic rigor, analytical thinking, quantitative assessment, and analysis of complex systems in human biology.
5. Require a different, larger, more molecularly oriented and scientifically sophisticated knowledgebase.

### General Recommendations:

1. Encourage interdisciplinary courses that break down barriers (and traditional educational “silos”) among, and demonstrate complementary concepts in, biology, chemistry, physics, and mathematics.
2. Emphasize the basis of ideas, not rote recitation of principles.
3. Emphasize hypothesis-driven problem derivation in course content, small-section exercises, and laboratory components of courses.
4. Refocus the scientific rigor of undergraduate education.

### Discipline-Specific Recommendations:

#### Biology:

1. The required 1-year biology course should be devoted to genetics and cell biology.
2. Emphasize human biology (signal transduction, basic pharmacologic principles, homeostasis and feedback, hormone receptors, neuronal signaling, immunology).
3. Emphasize computational skills that tie previously disparate disciplines together.

#### Chemistry:

1. Expose students to general chemistry, organic chemistry, and biochemistry in a 2-year sequence that provides the foundation for the study of *biologically relevant* chemistry.
2. Organic chemistry preparation should be woven seamlessly with basic principles of biochemistry (especially protein structure and function).

#### Laboratory components of science courses:

1. Cut down lab hours (long, time-consuming, not well/efficiently spent)
2. Focus on hypothesis-driven exercises, problem-solving, hands-on demonstrations of important principles.

Computational skills:

1. Focus on biologically relevant algebraic and trigonometric quantitative skills.
2. Require familiarity with calculus, but not a focus on derivation of biologically low-relevance theorems.
3. Provide adequate grounding in statistics.

Physics:

1. Prepare students in biologically relevant areas (mechanics, kinetics, thermodynamics, properties of matter (quantum theory), wave theory, electricity and magnetism, and optics).

Analytical and writing skills:

1. Require a full year of critical writing/thinking (expository writing)

Effective communications skills:

1. Require fluency, with a nuanced facility, in English.
2. Mastery of a foreign language reinforces preparation for patient care in a multicultural society.

Other courses:

1. Encourage courses/activities that prepare students to understand human behavior, appreciate societal structure and function, achieve cultural awareness, and facilitate a habit of lifelong self-education.
  - a. Literature, languages, the arts, humanities, social sciences (psychology, sociology, anthropology, ethics, etc.)
  - b. Familiarity with computers
  - c. Honors courses and independent study/research

The Working Group also recommended that a joint HMS-FAS committee be formed to specify topics and details of courses. In specifying the focus on science preparation for postgraduate biology or medical studies, the Working Group recommended that curriculum planners avoid rendering the science-course time commitment too burdensome to allow attention to other academically challenging scholarly avenues, relying instead on refocusing and increasing the relevance and interdisciplinary content of science courses. To amplify the impact of these recommendations beyond our borders the Working Group urged HMS and FAS to open a dialogue among medical schools and undergraduate colleges on premedical requirements

## **Introduction**

The Committee interpreted the main goal of its charge as a request to develop a continuum in the education process from the premedical curriculum leading to the medical curriculum. While acknowledging the desirability of heterogeneity in undergraduate majors/concentrations and choosing not to recommend homogeneity in undergraduate preparation, the Committee emphasized the importance of providing the tools necessary to navigate a seamless continuum in scholastic and scientific rigor between the premedical curriculum and the 21<sup>st</sup> century curriculum at Harvard Medical School. Based upon a consensus that we are entering a sea change in the biological, social, economic, and ethical underpinnings of premedical and medical education, the Committee concentrated on a continuum in the preparation of students entering medical school, beginning in the undergraduate years. One primary goal should be an understanding of, and consensus about, what college science education ought to be and how it continues into the medical school years. A crucial link the Committee focused on was that between the undergraduate curriculum and the first two years of the medical school curriculum in which the seamlessness of science is most essential.

The requirements for medical school have remained basically unchanged for many decades, despite the obvious change in medical knowledge (e.g., about disease mechanisms and our understanding of drug actions), the pace of new discovery, and the permeation of biochemistry, cell biology, and genetics in most areas of medicine. Therefore, adequacy of preparation in the preclinical sciences requires acquisition of more information than in the past. Unlike in the past, currently, pathophysiology and pharmacology require detailed knowledge of molecular targets and biochemical mechanisms, and modern cell biology has become the language of medical disciplines such as pathology, oncology, cardiology, and neurology. A fundamental theme in the deliberations of the Committee was the desire to integrate human biology into undergraduate science education, taking into account the influences of systems biology.

## **General Recommendations**

The premedical curriculum should foster scholastic rigor, analytical thinking, quantitative assessment, and analyses of complex systems in human biology. In fact, an inculcation of scientific method and scientific rigor are deemed more important than the specific content of premedical science courses per se. We do recognize the reality that the college years are not, and should not be, designed primarily to prepare students for professional schools. Instead, the college years should be devoted to a creative engagement in the elements of a broad, intellectually expansive liberal arts education. Therefore, we support the basic elements of curricular review at Harvard College, including a reduction in the minimum number of required courses for a concentration and later declaration of concentration selection, which should foster freedom to experiment with new disciplines during the first two years. On the other hand, the current science courses offered in college that fulfill the admissions requirements of medical schools are not adequately focused on human biology to prepare a candidate for medical school. To prepare for a medical career in the 21<sup>st</sup> Century will require a different, larger, more molecularly

oriented and scientifically sophisticated knowledge-base than that required for the curriculum when the New Pathway was introduced 20 years ago.

Given how constrained the time can be for science preparation in an undergraduate curriculum, students who are interested in the biological sciences and medicine would benefit more from chemistry, physics, and even biology courses that emphasize preparation for the contemporary biomedical scientific enterprise. Current introductory undergraduate courses in these sciences are designed for a wide range of students, many of whom will take no additional science courses and some of whom are preparing for careers in disciplines far removed from human biology and medicine. Students preparing for medical school are often required to spend considerable time on areas of physics, chemistry, mathematics, and biology that are so removed from human biological principles that they offer little value to the premedical student and actually occupy valuable time that could be spent on more relevant science preparation. Therefore, instead of relinquishing to undergraduate departments decisions over what constitutes a course in *general* chemistry or organic chemistry, medical schools ought, instead, to define exactly what areas of preparation in these sciences are necessary for the preparation of a future physician or biomedical scientist. Potentially, without adding extra semesters or years spent in premedical science courses, colleges could provide more focused, relevant courses that would include, for example, more biochemistry, molecular biology, and cellular biology.

Moreover, achieving economies in time spent on science courses would be facilitated by breaking down barriers among departments and fostering interdisciplinary approaches to science education. Indeed, the need for increased scientific rigor is most likely to be met by more interdisciplinary courses. For students preparing to become physicians or to pursue biomedical careers, medical school requirements often drive undergraduate science curriculums. Thus, a partnership to make biology, chemistry, physics, and mathematics come together is absolutely essential to a well-grounded preparation for medical school and for a seamless transition into the new medical school curriculum. Again, we applaud the Harvard College Curricular Review proposal to introduce interdisciplinary courses in the life sciences and physical sciences. Moreover, critical reading and thinking are an essential component of the undergraduate and continuing education of the premedical and medical student. Critical and analytical approaches to learning among both premedical and medical students should be especially emphasized at a time when the barriers between the scientific disciplines are becoming less distinct. Thus, English and mathematics, which involve critical and quantitative thinking, respectively, should be emphasized in curriculum reform and admission requirements, not de-emphasized.

From the perspective of the basic science faculty at Harvard Medical School, currently, the preparation and knowledge base of entering Harvard medical students are too diverse; in each class, a wide range exists in the scholastic rigor, content, and quantitative skills necessary for mastery of such courses as biochemistry and cell biology. On the extremes

of this wide spectrum are, on the one hand, students with limited preparation in biochemistry, who struggle academically during the first year at HMS. On the other hand, students better prepared in the quantitative areas of biochemistry, physics, and mathematics, including some with advanced degrees in these disciplines, find HMS first-year course work dull, slow, and intellectually unchallenging. The Committee concluded that a uniform level of preparation in biochemistry should be required and/or that stratified tiers of first-year HMS courses like biochemistry be offered to accommodate those with different backgrounds.

### **Specific Recommendations**

To foster the type of preparation necessary for the new HMS curriculum, the Committee proposed the following:

1. Skill sets should be taught to undergraduates in an integrative way, with the goal of developing a shared vocabulary of modern biology. Interdisciplinary courses that break down the barriers among, demonstrate complementary concepts of, and highlight collective wisdom in, biology, chemistry, physics, and mathematics should be encouraged. In short, a focus on integration of principles over several courses should be emphasized. Realistically, this will require champions at the college level for breaking down traditional educational “silos,” and this approach increases the workload of teaching and demands on students. The HMS faculty are prepared to work with the Faculty of Arts and Sciences to foster such interdisciplinary approaches to undergraduate science education.
2. The experimental basis of ideas, not rote recitation of principles, should be emphasized in the undergraduate science curriculum.
3. Course content, small-section exercises, and, especially, laboratory components of courses should emphasize hypothesis-driven problem derivation.
4. HMS faculty should work with Harvard undergraduate science departments to refocus the scientific rigor of undergraduate education. This process will be vitalized by the current curricular review at Harvard College in which core courses are to be eliminated and distribution requirements redefined.
5. The one-year required biology course should be devoted to genetics (including nucleic acid structure and function, genetic recombination, and mechanisms of gene expression in eukaryotic and prokaryotic cells, i.e., molecular biology/genetics) and cell biology (including subcellular organization, differentiation, cellular metabolic function, energy transfer, structure-function relationships, reproduction, and membrane properties). Preparation in biology should place more of an emphasis on human biology and on principles of systems biology. Thus, specific concepts to be covered should include signal transduction, basic pharmacologic principles, principles of homeostasis and feedback, an introduction to hormone receptors, neuronal signaling, and immunology. Because biology is the most elegant expression of

chemistry, physics, and mathematics, computational skills that tie these previously separate disciplines together should be emphasized.

6. Without an increase in the two-year requirement in chemistry, the premedical chemistry curriculum should focus on more biologically relevant areas of general and organic chemistry. General chemistry preparation should include foundational topics in physical and inorganic chemistry such as bonding, molecular structure, chemical reactivity, equilibrium, energetics, and thermodynamics. Organic chemistry preparation should be woven seamlessly with basic principles of biochemistry (especially protein structure and function). The goal should be to expose students to general chemistry, organic chemistry, and biochemistry in a, two-year sequence that provides the foundation for the study of biologically relevant chemistry. There are many possible course sequences that can be used to satisfy this requirement, from the traditional sequence of one year of general chemistry followed by one year of organic chemistry to a sequence of interdisciplinary or more advanced courses that treat necessary core material.
7. Laboratory components of the science requirement courses should be re-evaluated. Consider cutting down on laboratory hours, which are long and time-consuming but not necessarily all well and efficiently spent. Proper focus on hypothesis-driven exercises, problem solving, and hands-on demonstrations of important principles should take precedence over lengthy laboratory time commitments that steal time away from other, more productive educational opportunities.
8. Computational skills are required for contemporary scientific literacy. Although the calculus of derivatives and integration represents important concepts for the precise, quantifiable understanding of dynamic physiological processes and systems, a full year of calculus focusing on the derivation of biologically low-relevance theorems is less important than a focus on more relevant algebraic and trigonometric quantitative skills. Still, for a medical student body adequately prepared for the quantitative reasoning demands of the new medical curriculum and certain medical specialties, to provide analytic perspective and to appreciate the uncertainties in evaluation of biological systems, students should be required to have familiarity with calculus. A broader and more flexible range of requirements should be encouraged, however, and, given the importance of statistics for understanding the literature of science and medicine, adequate grounding in statistics is recommended. Rather than increasing the one year devoted to mathematics preparation, the one-year effort should be more relevant to biology and medicine than the formerly required, traditional, one-year calculus course.
9. In the area of physics, students should be well prepared in biologically relevant areas of mechanics, kinetics, thermodynamics, the properties of matter (quantum theory)

and wave theory, electricity and magnetism, and optics.

10. Creative, complex, and compelling discoveries in medicine, as in other fields, involve grappling with good questions borne from close reading analyses and careful observations. Therefore, effective courses in science and non-science disciplines should focus on analytical and writing skills. In addition, at a minimum, HMS matriculants should have one year of critical writing/thinking preparation, preferably in a course devoted specifically to the development of expository writing skills. Specific skills students may be expected to master and apply to the fields of medicine and scientific inquiry include the following abilities:
  - a. Write logically and with clarity and style about important questions across disciplines.
  - b. Articulate persuasively, both on paper and in oral presentations, focused, sophisticated, and credible thesis arguments.
  - c. Appreciate the methodologies that particular disciplines apply for understanding and communicating results effectively.
  - d. Approach evidence with probity and intellectual independence.
  - e. Use source material appropriately with scrupulous and rigorous attribution.
11. Because effective communication among the medical care team and between physicians and patients is so crucial to the delivery of care, all matriculants should be fluent and have a nuanced facility in English. Mastery of a foreign language is a valuable skill that reinforces preparation for patient care in a multicultural society.
12. Courses and extracurricular experiences and activities that prepare candidates to understand human behavior, to appreciate societal structure and function, and to achieve cultural awareness provide valuable preparation for the study and practice of medicine. Courses in literature, languages, the arts, humanities, and the social sciences (e.g., psychology, sociology, anthropology, and ethics) are encouraged. At least 16 hours should be completed in these areas. In addition, familiarity with computers is necessary. Honors courses and independent study or research are encouraged, because they permit the student to explore an area of knowledge in depth and provide a scholarly experience that will facilitate a lifelong habit of self-education.
13. For each course requirement, Harvard Medical School should include specificity about topics that fall under general coursework in the list of requirements. Identifying the specific material to be covered is beyond the scope of this committee's mandate, but we recommend that a joint HMS and FAS committee be convened, as a logical extension of curricular reform at both the College and the Medical School, to specify these areas of preparation in the premedical sciences.
14. Currently, the time required for premedical undergraduate science preparation is substantial. In increasing the expectations for scientific rigor at the undergraduate level, the Committee was careful to avoid rendering the time commitment to science courses so burdensome that medical school candidacy would be limited to science

majors/concentrators and that little time would be available in college to pursue other academically challenging scholarly avenues, the foundation for intellectual growth. Therefore, the ideal solution is one in which the current time commitment to premedical science courses is refocused on more relevant content, interdisciplinary when practical, that can be covered within the same time frame or a time frame only modestly expanded.

15. On the one hand, the Committee acknowledges that issuing these recommendations may have a limited impact, at least initially, on premedical curricula at our own college and at other colleges. If the requirements for admission to Harvard Medical School differ too substantially from those at other medical schools, undergraduates preparing for medicine will encounter an impractical array of conflicting curricular demands. In addition, many undergraduate colleges base their premedical course offerings on the material required for the Medical College Application Test (MCAT). On the other hand, our goal is to challenge those who teach undergraduates and to lead by example, to open a dialogue among medical schools and undergraduate colleges and their faculties that will rationalize undergraduate preparation for the study of medicine. Our expectation is that such dialogue and the curricular experimentation engendered will reform the undergraduate education of future physicians and, in turn, lead to revisions in the competencies evaluated by the MCAT.

## Membership

**Dennis Ausiello, MD, *chair***

Jackson Professor of Clinical Medicine  
Harvard Medical School  
Chief, Department of Medicine  
Massachusetts General Hospital

**Jules Dienstag, MD, *co-chair***

Professor of Medicine  
Associate Dean for Academic and Clinical  
Programs  
Harvard Medical School  
Massachusetts General Hospital

**Anne Berg**

Director of Admissions and Student Affairs  
Harvard School of Dental Medicine

**Mohan Boodram, *Senior Staff***

Director of Admissions and Financial Aid  
Harvard Medical School

**Kenneth Bridges, MD**

Associate Professor of Medicine  
Brigham and Women's Hospital

**Michael Gimbrone, MD**

Elsie T. Friedman Professor of Pathology  
Head, Department of Pathology  
Brigham and Women's Hospital

**Alfred Goldberg, PhD**

Professor of Cell Biology  
Harvard Medical School

**Allan Goroll, MD**

Associate Professor of Medicine  
Massachusetts General Hospital

**Judith Murciano-Goroff**

Assistant Senior Tutor  
Expository Writing Program  
Harvard College  
Faculty of Arts and Sciences

**David Haig, Ph.D.**

Professor, Department of Organismic and  
Evolutionary Biology  
Head Biology Tutor, Harvard College  
Faculty of Arts and Sciences

**Stuart Mushlin, MD**

Assistant Professor of Medicine  
Brigham and Women's Hospital

**Shari Nethersole, MD**

Assistant Professor of Pediatrics  
Children's Hospital Boston

**Theresa Orr**

Associate Dean for Admissions and Student  
Services  
Harvard Medical School

**Thomas Ptak, MD**

Assistant Professor of Radiology  
Massachusetts General Hospital

**Christopher John Russell**

Student  
Harvard Medical School

**Daniel Shannon, MD**

Professor of Pediatrics and Health Sciences and  
Technology  
Massachusetts General Hospital

**Helen Shields, MD**

Associate Professor of Medicine  
Beth Israel Deaconess Medical Center

**Darrell Smith, MD**

Assistant Professor of Radiology  
Brigham and Women's Hospital

**Bruce Spiegelman, PhD**

Professor of Cell Biology  
Dana Farber Cancer Institute

**Gregg Tucci, Ph.D.**

Assistant Director of Undergraduate Studies  
Department of Chemistry  
Faculty of Arts and Sciences

**Gordon Strewler, MD**

Professor of Medicine  
Beth Israel Deaconess Medical Center

**Invited Guests and Witnesses**

**John Dowling, Ph.D.**

Professor of Biology  
Faculty of Arts and Sciences

**Benedict (Dick) Gross, Ph.D.**

Dean, Harvard College

**George Vasmer Leverett Professor of Mathematics**

Faculty of Arts and Sciences

**Dudley Herschbach, Ph.D.**

**Frank B. Baird, Jr. Professor of Science**

Faculty of Arts and Sciences

**Jeffrey Wolcowitz**

Associate Dean for Curriculum  
Harvard College
